# Supplementary material for: Drosophila bloom helicase maintains genome integrity by inhibiting recombination between divergent DNA sequences
Source: PubMed Central journal article supplement — Nucleic Acids Res. 2008 Oct 31;36(21):6907–17. doi: 10.1093/nar/gkn793 (PMC2588521; doi:10.1093/nar/gkn793), 2008-10-31
Supplement: gkn793_1.pdf [file gkn793_1.pdf]

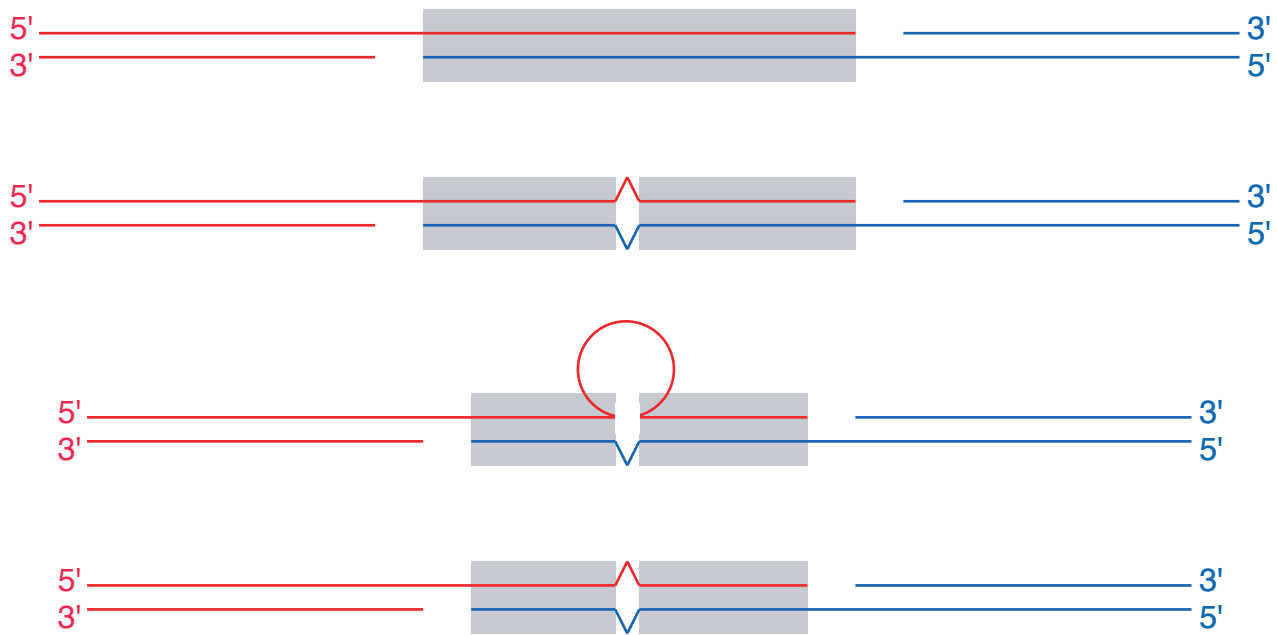

**Figure S1**

**Schematic of heteroduplex formation during SSA.** Annealed heteroduplexes during SSA are shown in a schematic drawing (not to scale). Double stranded DNA with 3' overhangs from both sides of the break are shown in red and blue. Grey bars indicate regions of sequence identity within the heteroduplex structure. Single nucleotide mismatches within the heteroduplex are indicated by kinked lines, whereas a non-matching intron sequence is indicated by a loop. Four heteroduplexes are shown, corresponding to the tester constructs MtnBgen-gen, MtnBgen\*-gen, MtnBgen-cDNA, and MtnBcDNA-cDNA\*.
