# Supplementary material for: Drosophila bloom helicase maintains genome integrity by inhibiting recombination between divergent DNA sequences
Source: PubMed Central journal article supplement — Nucleic Acids Res. 2008 Oct 31;36(21):6907–17. doi: 10.1093/nar/gkn793 (PMC2588521; doi:10.1093/nar/gkn793), 2008-10-31
Supplement: gkn793_2.pdf [file gkn793_2.pdf]

$\frac{y}{w}$  ;  $\frac{p\{MtnBgen-gen\}}{CyO}$  ;  $\frac{mus309^{D3}}{TM6B y^+}$  ♂♂ **X**  $w$  ;  $p\{v+ 70I-Scel\}$  ;  $\frac{mus309^{D2}}{TM2 y^+}$  ♀♀

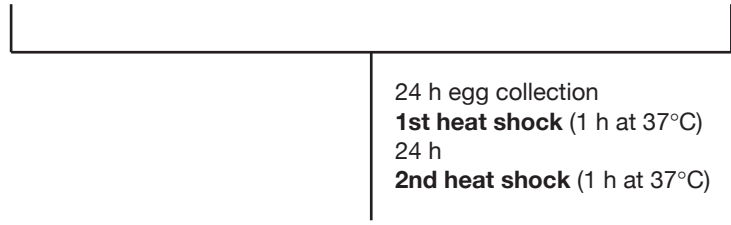

**blm -/-**

$\frac{w}{w}$  ;  $\frac{p\{MtnBgen-gen\}}{p\{v+ 70I-Scel\}}$  ;  $\frac{mus309^{D3}}{mus309^{D2}}$  ♂ **X**  $y w$  ♀♀ (on 500 μM CuSO<sub>4</sub>)

**blm +/-**

$\frac{w}{w}$  ;  $\frac{p\{MtnBgen-gen\}}{p\{v+ 70I-Scel\}}$  ;  $\frac{mus309^{D3}}{TM2 y^+}$  ♂ **X**  $y w$  ♀♀ (on 500 μM CuSO<sub>4</sub>)

**blm +/+**

$\frac{w}{w}$  ;  $\frac{p\{MtnBgen-gen\}}{p\{v+ 70I-Scel\}}$  ;  $\frac{TM6B y^+}{TM2 y^+}$  ♂ **X**  $y w$  ♀♀ (on 500 μM CuSO<sub>4</sub>)

**Figure S2**  
**Crossing scheme for SSA analysis in blm mutant flies**

For the investigation of SSA in *blm* mutants, tester constructs that are located on the 2nd chromosome were analyzed. All constructs were inserted with the help of P-elements. The tester construct transgene *p{MtnBgen-gen}* is marked with *w+*. The ratio of flies with EGFP positive abdomen per *w+* flies among the offspring was determined in all analysis tubes of the final cross for each genotype. Homozygous *blm* mutant genotypes are indicated in red. Identical analysis was also done for *p{MtnBgen\*-gen}* and *p{MtnBcDNA-gen}*.
