# Supplementary material for: Drosophila bloom helicase maintains genome integrity by inhibiting recombination between divergent DNA sequences
Source: PubMed Central journal article supplement — Nucleic Acids Res. 2008 Oct 31;36(21):6907–17. doi: 10.1093/nar/gkn793 (PMC2588521; doi:10.1093/nar/gkn793), 2008-10-31
Supplement: gkn793_4.pdf [file gkn793_4.pdf]

$\xrightarrow{yw}$  ;  $\frac{Df(2L)k08712-rv21 p\{v+ 70l-Scel\}}{Sp}$  ;  $\frac{+}{+}$  ♂♂ **X**  $yw$  ;  $\frac{Df(2L9b84h1 p\{CaGal\}}{CyO}$  ;  $\frac{M\{MtnBgen-gen\}zh86-Fb}{MKRS}$  ♀♀

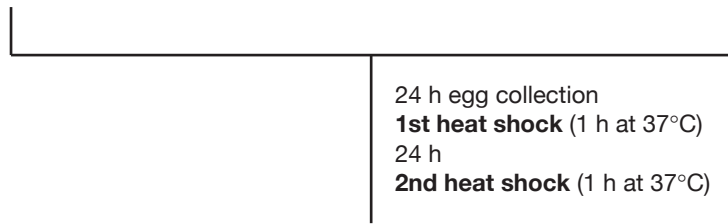

**spell1 -/-**  $\xrightarrow{yw}$  ;  $\frac{Df(2L)k08712-rv21 p\{v+ 70l-Scel\}}{Df(2L9b84h1 p\{CaGal\}}$  ;  $\frac{M\{MtnBgen-gen\}zh86-Fb}{+}$  ♂ **X**  $yw$  ♀♀ (on 500 μM CuSO<sub>4</sub>)

**spell1 +/-**  $\xrightarrow{yw}$  ;  $\frac{Df(2L)k08712-rv21 p\{v+ 70l-Scel\}}{CyO}$  ;  $\frac{M\{MtnBgen-gen\}zh86-Fb}{+}$  ♂ **X**  $yw$  ♀♀ (on 500 μM CuSO<sub>4</sub>)

#### Figure S4

#### Crossing scheme for SSA analysis of *spell* deficient flies with tester constructs on the 3rd chromosome

The tester construct transgene *M{MtnBgen-gen}zh86-Fb* is marked with *eye-RFP*.

The ratio of flies with EGFP positive abdomen per flies with RFP positive eyes among the offspring was determined in all analysis tubes of the final cross for each genotype.

Identical analysis was also done for *M{MtnBgen\*-gen}zh86-Fb* and *M{MtnBcDNA-gen}zh86-Fb*. *Spell* deficient genotypes are indicated in red.
