# Supplementary material for: Drosophila bloom helicase maintains genome integrity by inhibiting recombination between divergent DNA sequences
Source: PubMed Central journal article supplement — Nucleic Acids Res. 2008 Oct 31;36(21):6907–17. doi: 10.1093/nar/gkn793 (PMC2588521; doi:10.1093/nar/gkn793), 2008-10-31
Supplement: gkn793_5.pdf [file gkn793_5.pdf]

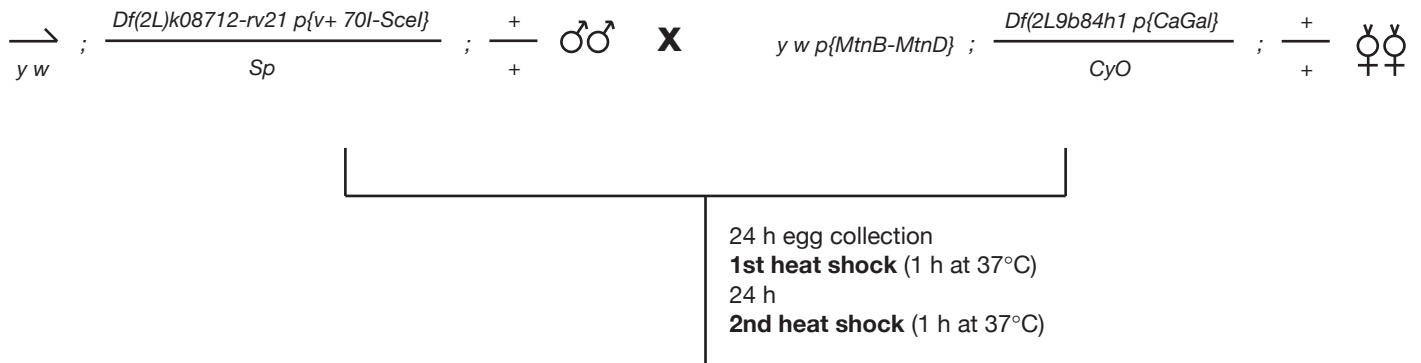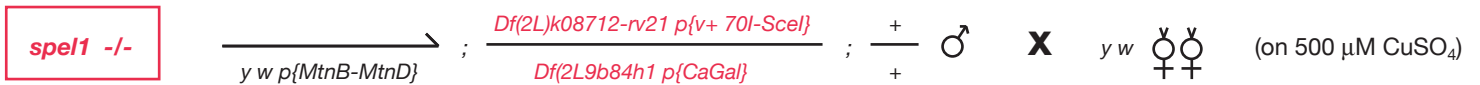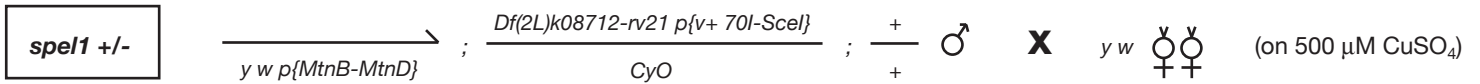

### Figure S5

#### Crossing scheme for SSA analysis of the MtnB-MtnD tester construct in *spell* deficient flies

SSA of MtnB-MtnD in *spell* deficient flies was analyzed with the tester construct located on the X chromosome, integrated via P-element.

The ratio of flies with EGFP positive abdomen per total female flies among the offspring was determined in all analysis tubes of the final cross for each genotype.

P-element insertion px-3 on the x-chromosome was used. *Spell* deficient genotypes are indicated in red.
