# Supplementary material for: Drosophila bloom helicase maintains genome integrity by inhibiting recombination between divergent DNA sequences
Source: PubMed Central journal article supplement — Nucleic Acids Res. 2008 Oct 31;36(21):6907–17. doi: 10.1093/nar/gkn793 (PMC2588521; doi:10.1093/nar/gkn793), 2008-10-31
Supplement: gkn793_6.pdf [file gkn793_6.pdf]

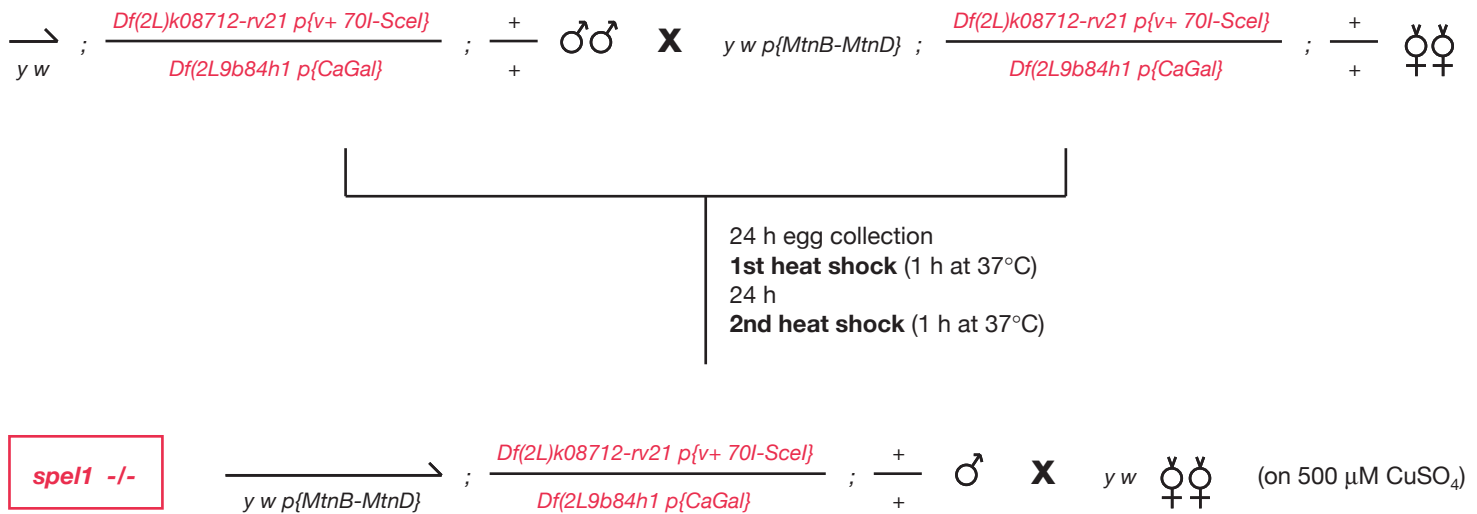

### Figure S6

**Crossing scheme for SSA analysis of the MtnB-MtnD tester construct in flies with *spell* deficient parents**

SSA of MtnB-MtnD in flies with *spell* deficient parents was analyzed with the tester construct located on the X chromosome, integrated via P-element (px-6). The ratio of flies with EGFP positive abdomen per total female flies among the offspring was determined in all analysis tubes of the final cross. This ratio was compared to the result from an independent experiment where the same ratio was determined with the identical P-element insertion (px-6, on X chromosome) in wildtype flies. *Spell* deficient genotypes are indicated in red.
