# Supplementary material for: Drosophila bloom helicase maintains genome integrity by inhibiting recombination between divergent DNA sequences
Source: PubMed Central journal article supplement — Nucleic Acids Res. 2008 Oct 31;36(21):6907–17. doi: 10.1093/nar/gkn793 (PMC2588521; doi:10.1093/nar/gkn793), 2008-10-31
Supplement: gkn793_7.pdf [file gkn793_7.pdf]

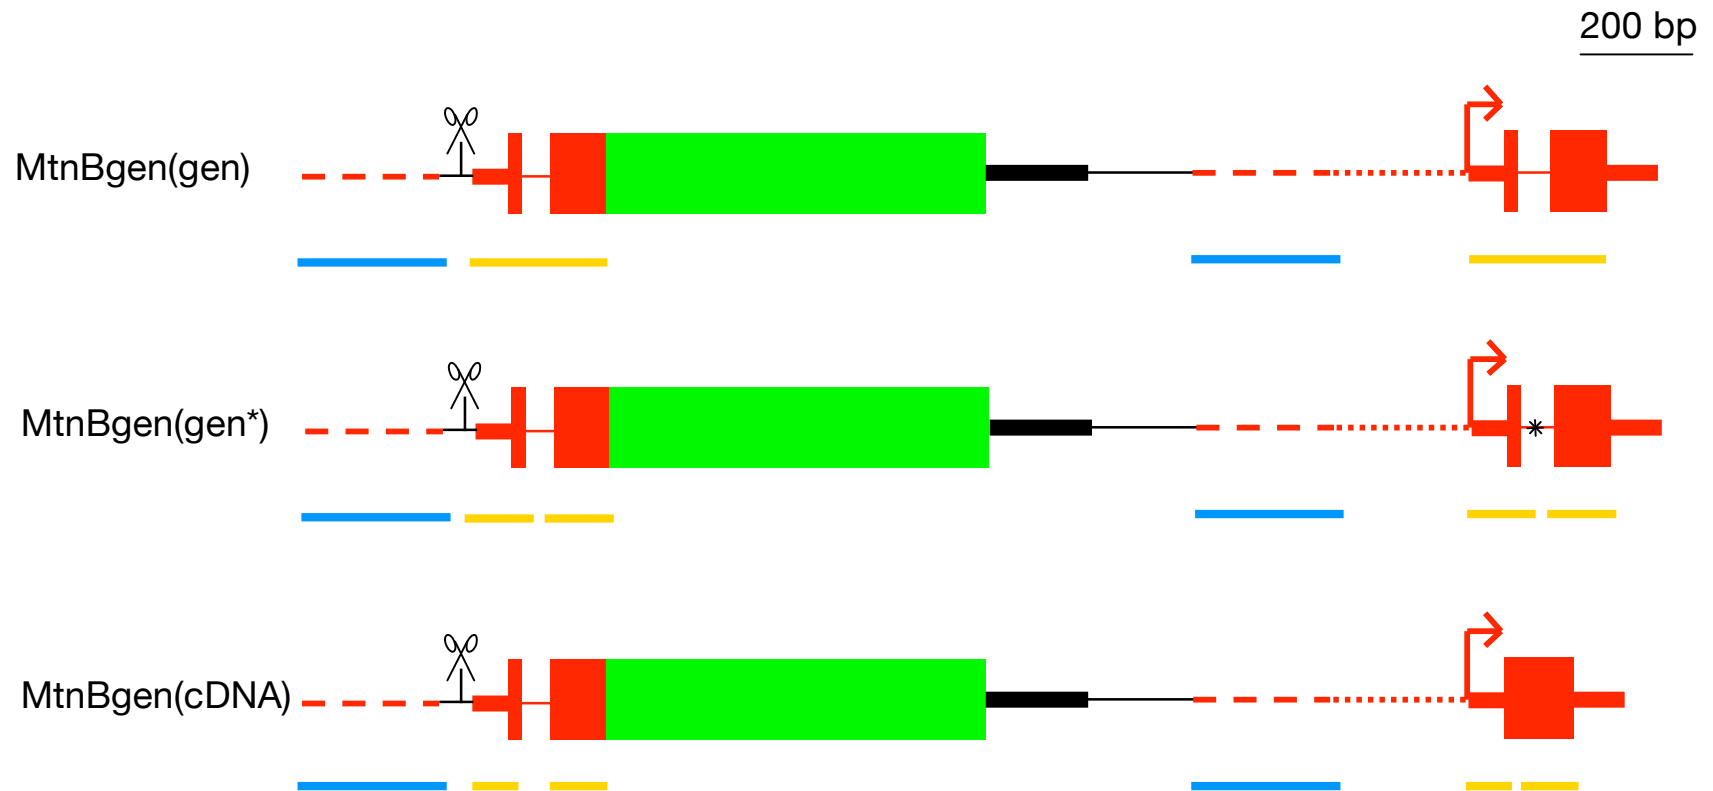

**Figure S7**

**Schematic of constructs to analyze ectopic homologous repair**

The transcription unit of MtnB is indicated in red as in figure 1. The green bar indicates EGFP cDNA. Note that in front of the MtnB-EGFP fusion construct only the distal sequences are present and hence no transcription takes place. Thus the arrangement is such that conversion to a functional GFP reporter requires homologous recombination, rather than SSA. The kinked arrow on the righthand side denotes the presence of a complete MtnB promoter/enhancer region, consisting of a distal and a proximal part (dashed and dotted lines, respectively). The construct can be cleaved by ISce-I as indicated by the scissors. Upon ectopic homologous repair, the downstream part of the promoter can be copied into the cleaved construct and MtnB-EGFP fusion transcripts can be expressed. Blue and orange bars represent sequence identities.
